# Supplementary material for: Comparison of Osteosarcoma Aggregated Tumour Models with Human Tissue by Multimodal Mass Spectrometry Imaging
Source: MDPI journal article supplement (doi:10.3390/metabo11080506), 2021-07-31
Supplement: s1 [file s1]

## Supplementary Information

**Supplementary Figure S1.** Mean intensity plotted on bar graph of fatty acid detection within OS human tissue and OS aggregoid models. Data is mean  $\pm$  SD (n=3), unpaired t-test \*  $p < 0.05$ , \*\*  $p < 0.01$ . Peaks identified in human tissue a)  $m/z$  279.234, FA 18:2; b)  $m/z$  281.247, FA 18:1; c)  $m/z$  303.231, FA 20:4. Peaks identified in OS models d)  $m/z$  279.235, FA 18:2; e)  $m/z$  281.248, FA 18:1; f)  $m/z$  303.231, FA 20:4.

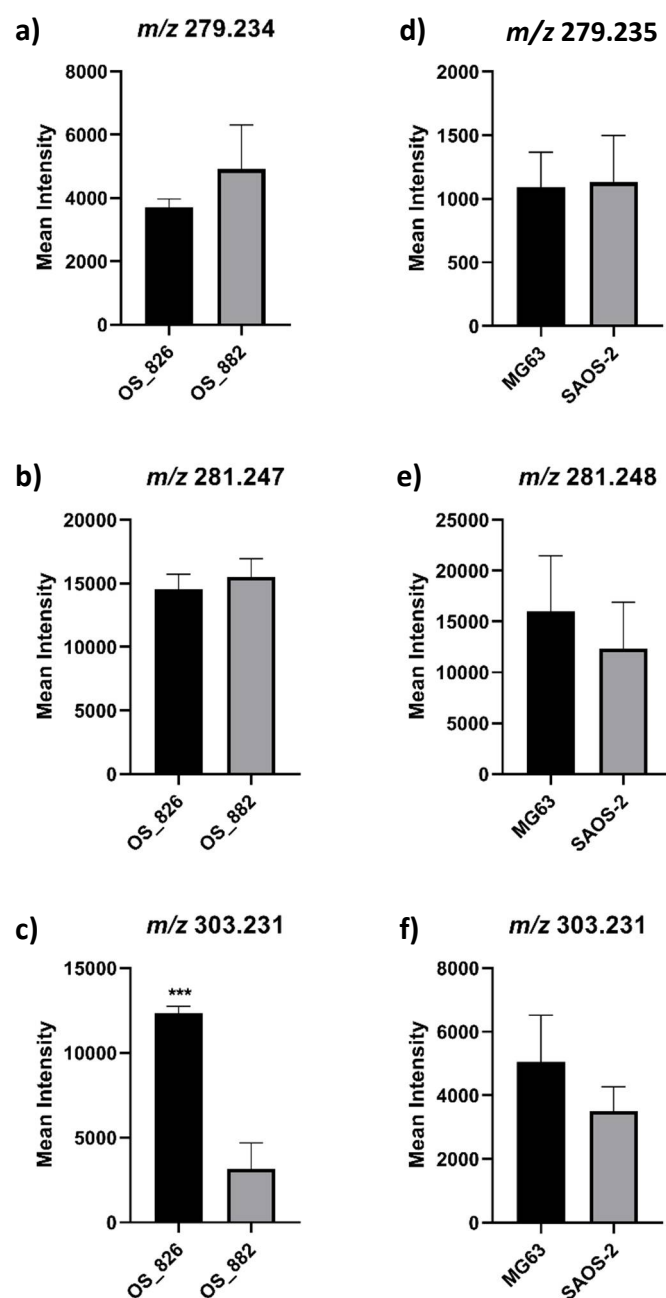

**Supplementary Figure S2.** Mean intensity plotted on bar graph of metastasis-related phospholipid species within OS human tissue and OS aggregoid models. Data is mean  $\pm$  SD (n=3), unpaired t-test \*  $p < 0.05$ , \*\*  $p < 0.01$ . Peaks identified in human tissue a)  $m/z$  810.528, PS 38:4; b)  $m/z$  885.550, PI 38:4. Peaks identified in OS models d)  $m/z$  810.530, PS 38:4; e)  $m/z$  885.549, PI 38:4.

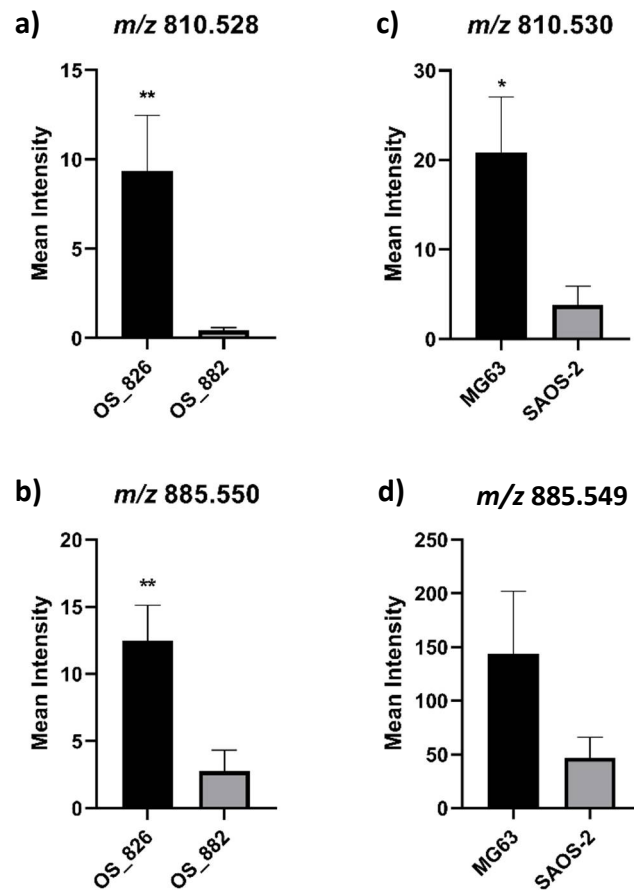

**Supplementary Figure S3.** Mean intensity plotted on bar graph of ceramide species detected within OS human tissue and OS aggregoid models. Data is mean  $\pm$  SD (n=3), unpaired t-test \*  $p < 0.05$ , \*\*  $p < 0.01$ , \*\*\*  $p < 0.001$ . Peaks identified in human tissue a)  $m/z$  536.505, Cer 34:1;O2; b)  $m/z$  572.484, Cer 34:1;O2 [M+Cl]<sup>-</sup>. Peaks identified in OS models c)  $m/z$  536.504, Cer 34:1;O2; d)  $m/z$  572.480, Cer 34:1;O2 [M+Cl]<sup>-</sup>.

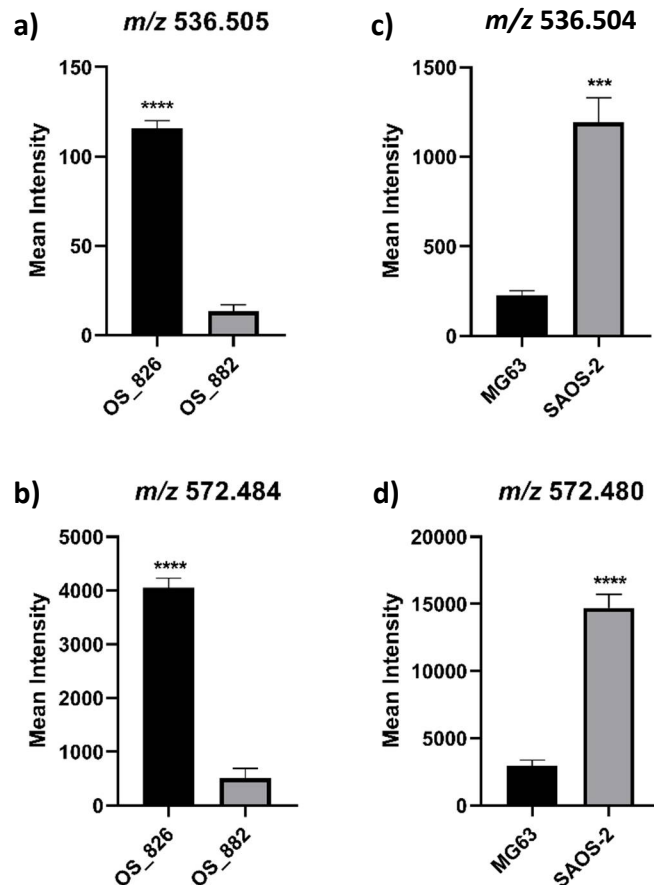

**Supplementary Table S1.** Protein and protein modification markers and the respective antibodies used. Antibodies were metal-tagged and validated in house by AstraZeneca.

| Target   | Annotation           | Clone      | Metal tag | Host specimen | Product code |
|----------|----------------------|------------|-----------|---------------|--------------|
| Vimentin | Mesenchyl            | D21H3      | 143Nd     | Rabbit        | 3143027D     |
| pNDRG1   | Stress response      | D98G11     | 159Tb     | Rabbit        | 5282         |
| GLUT1    | Proxy hypoxia marker | EPR3915    | 160Gd     | Rabbit        | ab196357     |
| Ki67     | Proliferation        | B56        | 162Dy     | Mouse         | 3162012B     |
| Collagen | Extracellular matrix | Polyclonal | 169Tm     | Goat          | 3169023D     |
| pS6      | mTOR signalling      | N7-548     | 172Yb     | Mouse         | 3172008A     |
| yH2AX    | DNA damage           | JBW301     | 173Yb     | Mouse         | 05-636       |
| pHH3     | Mitosis              | HTA28      | 176Yb     | Rat           | 3176024D     |
